# Supplementary material
Source: PubMed Central journal article supplement (PMC7015248)

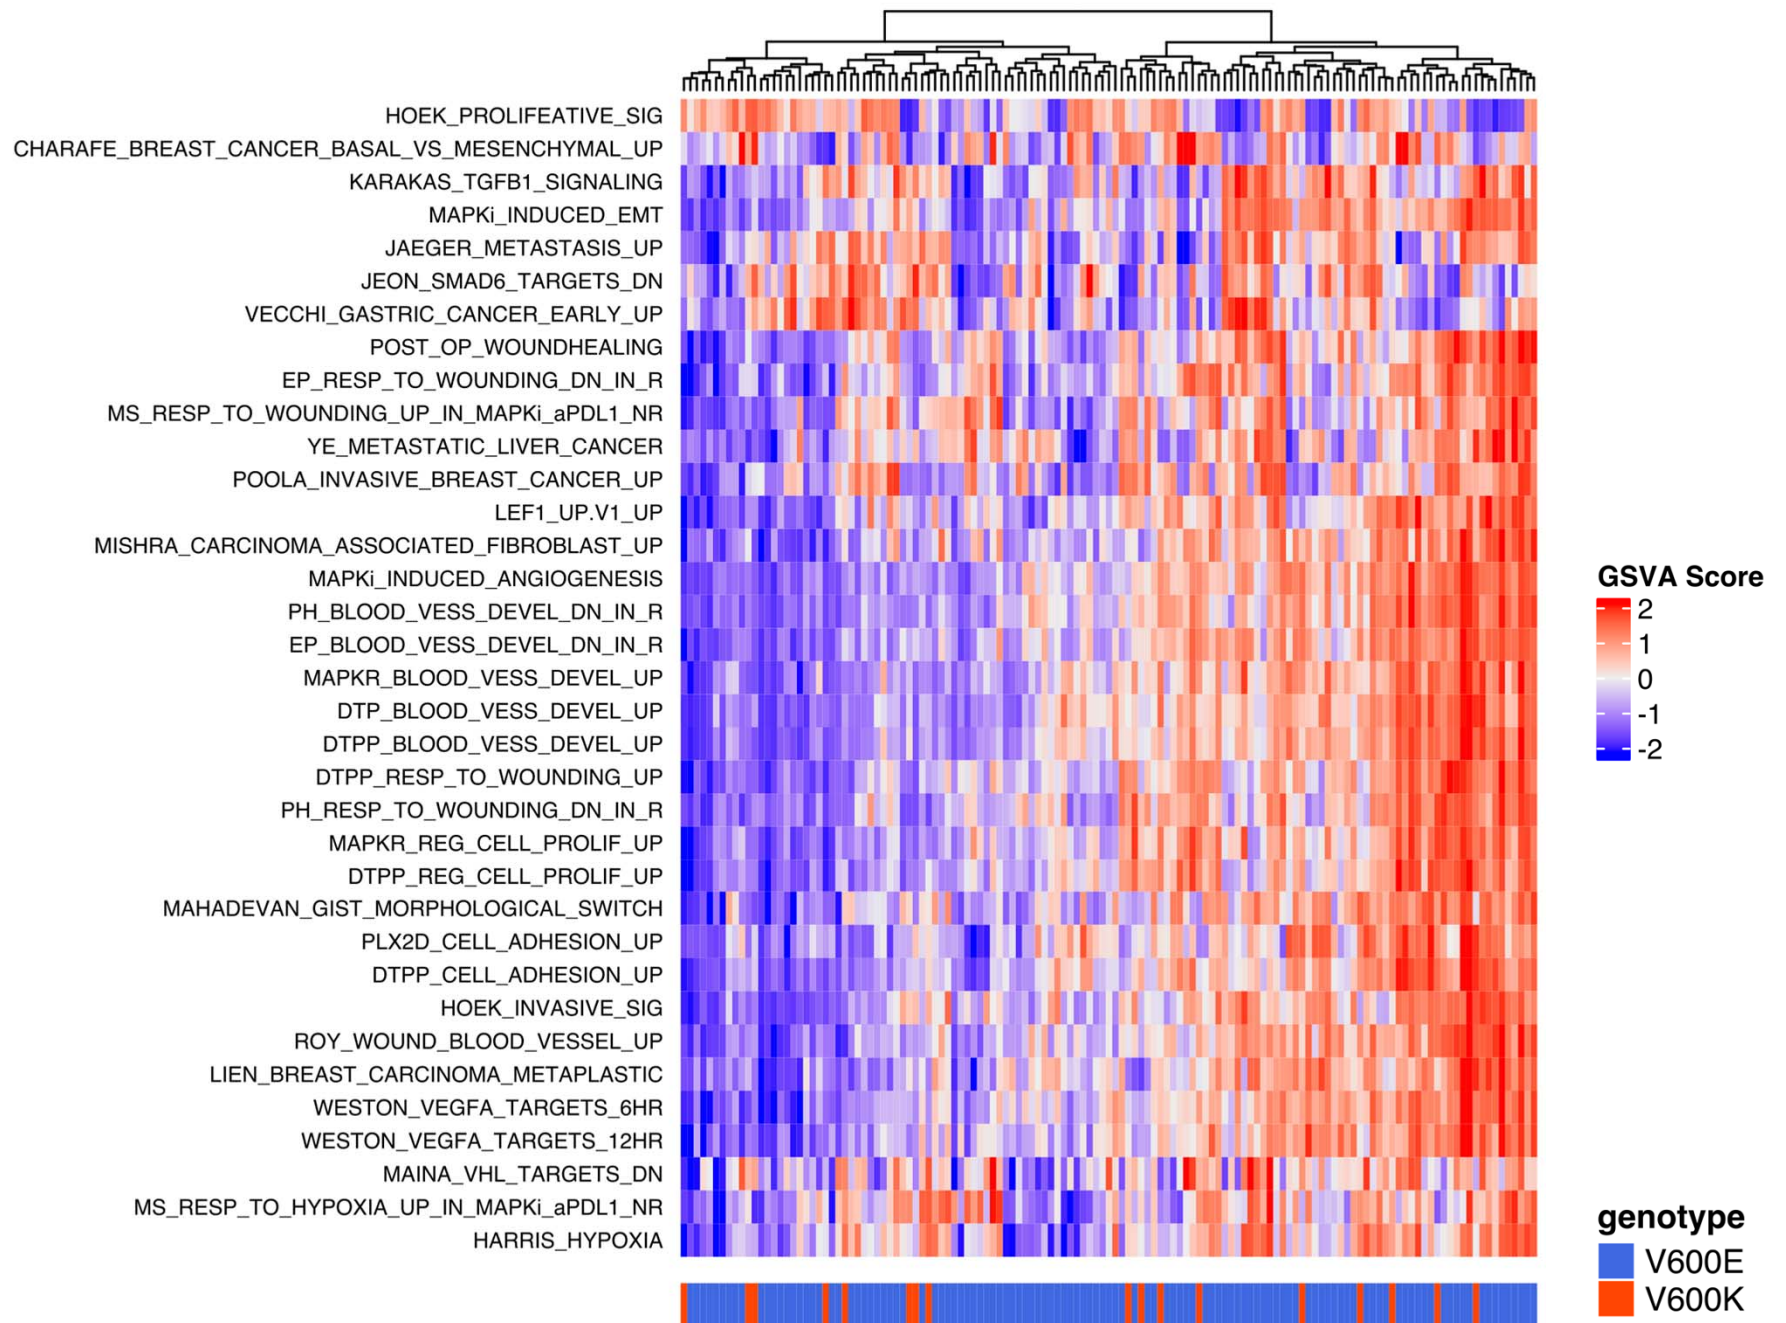

Supplement: NIHMS1010451-supplement-S4.pdf [file NIHMS1010451-supplement-S4.pdf]
